# Supplementary material
Source: PubMed Central journal article supplement (PMC3872055)
Supplement: NIHMS529428-supplement-01.pdf [file NIHMS529428-supplement-01.pdf]

- Ostfeld, R. S., C. D. Canham, K. Oggenfuss, R. J. Winchcombe, and F. Keesing. 2006. Climate, deer, rodents, and acorns as determinants of variation in Lyme-disease risk. *PLoS Biology* 4:e145.
- Ostfeld, R. S., K. R. Hazler, and O. M. Cepeda. 1996. Temporal and spatial dynamics of *Ixodes scapularis* (Acari: Ixodidae) in a rural landscape. *Journal of Medical Entomology* 33:90–95.
- Parkinson, A. J., and J. Berner. 2009. Climate change and impacts on human health in the Arctic: an international workshop on emerging threats and the response of Arctic communities to climate change. *International Journal of Circumpolar Health* 68:84–91.
- Perret, J.-L., P. M. Guerin, P. A. Diehl, M. I. Vlimant, and L. Gern. 2003. Darkness induces mobility, and saturation deficit limits questing duration, in the tick *Ixodes ricinus*. *Journal of Experimental Biology* 206:1809–1815.
- Perret, J.-L., O. Rais, and L. Gern. 2004. Influence of climate on the proportion of *Ixodes ricinus* nymphs and adults questing in a tick population. *Journal of Medical Entomology* 41:361–365.
- R Development Core Team. 2008. R: A language and environment for statistical computing. R Foundation for Statistical Computing, Vienna, Austria.
- Randolph, S. E. 1998. Ticks are not insects: consequences of contrasting vector biology for transmission potential. *Parasitology Today* 14:186–192.
- Rosenberg, M. S., and C. D. Anderson. 2011. PASSaGE: pattern analysis, spatial statistics and geographic exegesis. Version 2. *Methods in Ecology and Evolution* 2:229–232.
- Rykiel, E. J. 1996. Testing ecological models: the meaning of validation. *Ecological Modelling* 90:229–244.
- SAS. 2007. JMP. Version 7. SAS Institute, Cary, North Carolina, USA.
- SPSS. 2008. SPSS. Version 13. SPSS, Chicago, Illinois, USA.
- Sutherst, R., and A. Bourne. 2009. Modelling non-equilibrium distributions of invasive species: a tale of two modelling paradigms. *Biological Invasions* 11:1231–1237.
- Taylor, L. H., S. M. Latham, and M. E. Woolhouse. 2001. Risk factors for human disease emergence. *Philosophical Transactions of the Royal Society B: Biological Sciences* 356:983–989.
- Zeileis, A., C. Kleiber, and S. Jackman. 2007. Regression models for count data in R. Research Report Series, Department of Statistics and Mathematics, Vienna University of Economics and Business Administration, Vienna, Austria.

## SUPPLEMENTAL MATERIAL

### APPENDIX

Table A1. Rates of human Lyme disease cases per 100,000 habitants in Hudson River Valley counties (years 1994–2001).

| County      | 1994  | 1995  | 1996  | 1997 | 1998  | 1999  | 2000  | 2001   |
|-------------|-------|-------|-------|------|-------|-------|-------|--------|
| Albany      | 4.7   | 2.7   | 2.3   | 2.6  | 8.3   | 4.9   | 19.5  | 22.4   |
| Columbia    | 53    | 59.3  | 234.5 | 208  | 376   | 602.4 | 944.4 | 1025.5 |
| Delaware    | 2.1   | 8.5   | 0     | 4.2  | 4.2   | 6.4   | 2.2   | 4.2    |
| Dutchess    | 325   | 346.2 | 683.6 | 388  | 572   | 511.6 | 404.9 | 400.1  |
| Fulton      | 5.5   | 0     | 3.7   | 5.5  | 0     | 5.5   | 1.9   | 1.8    |
| Greene      | 17.2  | 4.3   | 29.9  | 29.5 | 46.3  | 64.4  | 200.6 | 197.1  |
| Hamilton    | 18.5  | 0     | 0     | 18.2 | 0     | 0     | 19.3  | 0      |
| Herkimer    | 0     | 0     | 0     | 1.5  | 0     | 0     | 0     | 1.6    |
| Montgomery  | 1.9   | 0     | 0     | 0    | 1.9   | 0     | 4     | 2      |
| Orange      | 91.5  | 77.3  | 81.3  | 78.2 | 120.3 | 132   | 182.8 | 155.8  |
| Otsego      | 4.9   | 4.9   | 4.9   | 4.9  | 1.6   | 0     | 3.3   | 1.6    |
| Putnam      | 378.8 | 312.9 | 384.9 | 170  | 258.2 | 193.3 | 305.8 | 220.4  |
| Rensselaer  | 6.4   | 3.2   | 7.6   | 5.7  | 4.4   | 15    | 44.9  | 57.7   |
| Rockland    | 44.3  | 42.8  | 16.7  | 30.5 | 36.3  | 19.6  | 24.6  | 33.8   |
| Saratoga    | 3.1   | 3.1   | 3.1   | 2.5  | 1     | 0.5   | 5.5   | 7.5    |
| Schenectady | 2     | 2.7   | 3.3   | 1.3  | 4.7   | 4     | 4.9   | 2      |
| Schoharie   | 9.1   | 9.1   | 0     | 5.9  | 5.9   | 0     | 0     | 6.3    |
| Sullivan    | 12.9  | 24.4  | 11.4  | 4.3  | 8.6   | 4.3   | 20.2  | 10.8   |
| Ulster      | 24.4  | 31    | 36.3  | 64.3 | 98.2  | 89.2  | 127.9 | 113.6  |
| Warren      | 1.6   | 0     | 3.2   | 0    | 0     | 0     | 0     | 4.7    |
| Washington  | 6.6   | 0     | 3.3   | 1.6  | 0     | 0     | 1.7   | 0      |
| Westchester | 151.4 | 78.2  | 77.7  | 32.4 | 62.2  | 60.5  | 30.9  | 44.7   |

Table A2. Rates of human Lyme disease cases per 100,000 habitants in Hudson River Valley counties (years 2002–2009).

| County      | 2002   | 2003   | 2004  | 2005  | 2006  | 2007  | 2008  | 2009  |
|-------------|--------|--------|-------|-------|-------|-------|-------|-------|
| Albany      | 56     | 33.4   | 75.9  | 102.9 | 117   | 143.5 | 213.2 | 214   |
| Columbia    | 1583.4 | 1422.9 | 637.2 | 568.6 | 589.4 | 505.1 | 936.5 | 922.5 |
| Delaware    | 4.2    | 0      | 4.2   | 12.7  | 4.2   | 8.5   | 19.4  | 19.5  |
| Dutchess    | 614    | 445.9  | 369.9 | 476.5 | 315.4 | 186.7 | 389.8 | 334.3 |
| Fulton      | 0      | 0      | 1.8   | 3.6   | 0     | 1.8   | 10.9  | 18.2  |
| Greene      | 371.4  | 245.2  | 202.6 | 246   | 295.9 | 315.1 | 635.6 | 820.5 |
| Hamilton    | 0      | 0      | 18.9  | 0     | 0     | 58.1  | 0     | 19.9  |
| Herkimer    | 4.7    | 3.1    | 3.1   | 3.1   | 7.8   | 6.3   | 17.6  | 24.1  |
| Montgomery  | 2      | 2      | 4.1   | 6.1   | 8.2   | 14.3  | 51.3  | 43.1  |
| Orange      | 158.5  | 164.5  | 142.6 | 144.7 | 125.2 | 135.4 | 262.8 | 286.6 |
| Otsego      | 4.9    | 3.2    | 1.6   | 0     | 0.8   | 12.8  | 22.4  | 21    |
| Putnam      | 258    | 308.4  | 205.9 | 189.9 | 148.3 | 139.2 | 203   | 383.9 |
| Rensselaer  | 80     | 102.4  | 129.9 | 135   | 174.6 | 224.7 | 349   | 283.4 |
| Rockland    | 41.8   | 67.2   | 57    | 86.5  | 83    | 67.8  | 119.1 | 109.9 |
| Saratoga    | 7.5    | 5.3    | 20    | 32.4  | 38.6  | 58.5  | 168.6 | 187.4 |
| Schenectady | 4.8    | 8.8    | 11.5  | 17.6  | 14.8  | 22.6  | 61.7  | 86.5  |
| Schoharie   | 6.3    | 6.3    | 6.3   | 12.5  | 15.5  | 34.2  | 71.7  | 81.5  |
| Sullivan    | 24.3   | 20.2   | 52    | 47.3  | 44.4  | 90.1  | 154.7 | 149.6 |
| Ulster      | 187.9  | 166.7  | 162.9 | 220.1 | 196   | 197.6 | 427.8 | 320.4 |
| Warren      | 1.6    | 0      | 13.9  | 18.4  | 18.3  | 30.3  | 30.2  | 142.5 |
| Washington  | 1.6    | 8.2    | 27.5  | 35    | 88.9  | 131   | 291.7 | 312.1 |
| Westchester | 36.7   | 79.6   | 79.3  | 48.6  | 28    | 37.9  | 107.8 | 69.1  |

Table A3. List of all competitive models identified for nymph density, ranked by  $\Delta AIC_c$ . The selected model, used in prediction, is indicated with boldface. All models included year, week, latitude, and longitude.

| Nymph model; additional covariables included                                              | Parameters | $\Delta AIC_c$ | $R^2$        |
|-------------------------------------------------------------------------------------------|------------|----------------|--------------|
| <b>Summer prec, min winter temp, forest</b>                                               | <b>9</b>   | <b>0</b>       | <b>0.642</b> |
| Summer prec, min winter temp, forest, forest border/area                                  | 10         | 0.8929         | 0.654        |
| Summer prec, min winter temp, forest, forest border/area, area forest patch (100 m radio) | 10         | 0.9238         | 0.653        |
| Week <sup>2</sup> , summer prec, min winter temp, forest                                  | 10         | 1.2927         | 0.651        |
| Year <sup>2</sup> , summer prec, min winter temp, forest                                  | 10         | 1.5904         | 0.648        |
| Summer prec, min winter temp, forest <sup>int</sup> , forest border/area <sup>int</sup>   | 11         | 1.7230         | 0.665        |
| Summer prec, min winter temp, forest, urban                                               | 10         | 1.9315         | 0.646        |

Notes: Abbreviations are: prec: precipitation; min: minimum; temp: temperature. Superscript *int* marks interactions between variables. Superscript 2 indicates additional quadratic term.

Table A4. List of all competitive models identified for adult density, ranked by  $\Delta AIC_c$ . The selected model, used in prediction, is indicated with boldface. All models included year, week, latitude, and longitude.

| Adult model; additional covariables included                                                                                                                                                       | Parameters | $\Delta AIC_c$ | $R^2$        |
|----------------------------------------------------------------------------------------------------------------------------------------------------------------------------------------------------|------------|----------------|--------------|
| <b>Winter prec, min winter temp, forest<sup>int</sup>, urban<sup>int</sup></b>                                                                                                                     | <b>11</b>  | <b>0</b>       | <b>0.622</b> |
| Air temp during collection, winter prec, min winter temp, forest <sup>int</sup> , urban <sup>int</sup>                                                                                             | 12         | 0.0328         | 0.633        |
| Annual prec, min winter temp, forest <sup>int</sup> , urban <sup>int</sup>                                                                                                                         | 11         | 0.3530         | 0.620        |
| Air temp during collection, humidity during collection, winter prec, min winter temp, forest <sup>int</sup> , urban <sup>int</sup>                                                                 | 13         | 0.5026         | 0.643        |
| Air temp during collection <sup>int(1)</sup> , humidity during collection <sup>int(1)</sup> , winter prec, min winter temp, forest <sup>int(2)</sup> , urban <sup>int(2)</sup>                     | 14         | 0.6625         | 0.653        |
| Winter prec, min winter temp, forest <sup>int</sup> , urban <sup>int</sup> , area forest patch (500 m radio)                                                                                       | 12         | 0.7718         | 0.630        |
| Year <sup>2</sup> , week <sup>2</sup> , winter prec, min winter temp, forest <sup>int</sup> , urban <sup>int</sup>                                                                                 | 13         | 0.8805         | 0.641        |
| Humidity during collection, winter prec, min winter temp, forest <sup>int</sup> , urban <sup>int</sup> , forest border/area                                                                        | 13         | 1.0536         | 0.64         |
| Winter prec, min winter temp, forest <sup>int</sup> , urban <sup>int</sup> , area forest patch (50 m radio)                                                                                        | 12         | 1.1198         | 0.628        |
| Week <sup>2</sup> , winter prec, min winter temp, forest <sup>int</sup> , urban <sup>int</sup>                                                                                                     | 12         | 1.2994         | 0.630        |
| Air temp during collection, winter prec, min winter temp, forest <sup>int</sup> , urban <sup>int</sup> , forest border/area                                                                        | 13         | 1.3167         | 0.639        |
| Winter prec, forest <sup>int</sup> , urban <sup>int</sup> , area forest patch (100 m radio)                                                                                                        | 12         | 1.3411         | 0.627        |
| Annual prec, annual temp, forest <sup>int</sup> , urban <sup>int</sup>                                                                                                                             | 11         | 1.4058         | 0.614        |
| Winter prec <sup>2</sup> , min winter temp, forest <sup>int</sup> , urban <sup>int</sup>                                                                                                           | 12         | 1.6074         | 0.625        |
| Winter prec, annual temp, forest <sup>int</sup> , urban <sup>int</sup>                                                                                                                             | 11         | 1.7159         | 0.613        |
| Air temp during collection, humidity during collection, winter prec, min winter temp, forest border/area                                                                                           | 14         | 1.7981         | 0.648        |
| Week <sup>2</sup> , air temp during collection <sup>int(1)</sup> , humidity during collection <sup>int(1)</sup> , winter prec, min winter temp, forest <sup>int(2)</sup> , urban <sup>int(2)</sup> | 15         | 1.8734         | 0.659        |

Notes: Abbreviations are: prec, precipitation; min, minimum; temp, temperature. Superscript *int* marks interactions between variables. Superscript 2 indicates additional quadratic term.

Table A5. In order to assess the robustness of our models to uneven sampling, we randomly selected subsets from each dataset to create datasets with locations evenly stratified by latitude. These subsets represent 60.9% and 41.42% of the dataset originally used for model development of nymphs and adults, respectively. The parameters estimates obtained with such unbiased subsets are remarkably similar to those obtained with the full dataset. The unbiased nymph model (Regression model for nymph density estimates using a randomly selected subset evenly stratified by latitude;  $R^2 = 0.604$ ,  $F = 12.874$ ,  $df = 58$ ,  $P < 0.0001$ ), with roughly 60% of the data points, is practically identical to the original (see Table 2). Two of the covariables (longitude and summer precipitations) are not significant after Bonferroni corrections when compared with the original model. The unbiased adult model (Regression model for adult density estimates using a randomly selected subset evenly stratified by latitude;  $R^2 = 0.76$ ,  $F = 21.151$ ,  $df = 60$ ,  $P < 0.0001$ ), with roughly 40% of the data points, is similar to the original (see Table 2). Although exact parameters estimates and significance differ slightly, the relative effects and directions of each one are similar.

| Regression models for density estimates | Estimate  | SE       | SS      | F       | P       |
|-----------------------------------------|-----------|----------|---------|---------|---------|
| Parameters of nymph model               |           |          |         |         |         |
| Intercept                               | -319.8237 | 152.4867 |         |         | 0.0403  |
| Year                                    | 0.2960    | 0.0779   | 10.6165 | 14.4311 | 0.0003  |
| Week                                    | -0.1556   | 0.0299   | 19.9193 | 27.0763 | <0.0001 |
| Latitude                                | -3.8416   | 0.9308   | 12.5300 | 17.0321 | 0.0001  |
| Longitude                               | 1.2179    | 0.4773   | 4.7893  | 6.5101  | 0.0133  |
| Forest                                  | -2.3052   | 0.6356   | 9.6778  | 13.1550 | 0.0006  |
| Min. winter temp                        | -0.0496   | 0.0134   | 10.0960 | 13.7235 | 0.0005  |
| Summer prec                             | -0.0671   | 0.0270   | 4.5623  | 6.2015  | 0.0156  |
| Parameters of adult model               |           |          |         |         |         |
| Intercept                               | -403.3528 | 200.2421 |         |         | 0.0485  |
| Year                                    | 0.3813    | 0.0955   | 14.4560 | 15.9276 | 0.0002  |
| Week                                    | 0.1162    | 0.0149   | 55.3410 | 60.9758 | <0.0001 |
| Latitude                                | -4.8962   | 1.4699   | 10.0701 | 11.0955 | 0.0015  |
| Longitude                               | 1.9922    | 0.6281   | 9.1301  | 10.0597 | 0.0024  |
| Forest                                  | -2.4995   | 0.8919   | 7.1274  | 7.8531  | 0.0068  |
| Urban                                   | 1.6549    | 0.8959   | 3.0971  | 3.4125  | 0.0696  |
| Forest × urban                          | -9.4495   | 3.3695   | 7.1380  | 7.8648  | 0.0068  |
| Min winter temp                         | -0.0629   | 0.0307   | 3.7967  | 4.1834  | 0.0452  |
| Winter prec                             | -0.0406   | 0.0170   | 5.1741  | 5.7009  | 0.0201  |

Notes: Abbreviations are: prec, precipitation; min, minimum; temp, temperature. Interaction is marked with × between variables.

Table A6. Equivalent Poisson multiple regression models to the linear multiple regression selected for nymph (df = 101) and adult (df = 159) densities. Statistics presented include the standard error term (SE), Z-value, and the probability value (*P*).

| Regression models for density estimates | Estimate | SE       | Z       | <i>P</i> |
|-----------------------------------------|----------|----------|---------|----------|
| Parameters of nymph model               |          |          |         |          |
| Intercept                               | 7.8101   | 0.002043 | 3822.9  | <0.0001  |
| Year                                    | 0.2731   | 0.000532 | 513.0   | <0.0001  |
| Week                                    | -0.2051  | 0.000201 | -1020.3 | <0.0001  |
| Latitude                                | -4.1174  | 0.006662 | -618.0  | <0.0001  |
| Longitude                               | 1.1603   | 0.002869 | 404.5   | <0.0001  |
| Forest                                  | -1.8964  | 0.004653 | -407.5  | <0.0001  |
| Min winter temp                         | -0.0790  | 0.000173 | -456.9  | <0.0001  |
| Summer prec                             | -0.0559  | 0.000125 | -448.1  | <0.0001  |
| Parameters of adult model               |          |          |         |          |
| Intercept                               | 8.8220   | 0.0010   | 8814.9  | <0.0001  |
| Year                                    | 0.2277   | 0.00044  | 515.0   | <0.0001  |
| Week                                    | 0.1088   | 0.00009  | 1164.6  | <0.0001  |
| Latitude                                | -3.8730  | 0.00599  | -646.3  | <0.0001  |
| Longitude                               | 1.9630   | 0.00298  | 658.7   | <0.0001  |
| Forest                                  | -2.1120  | 0.00386  | -547.7  | <0.0001  |
| Urban                                   | -0.2678  | 0.00308  | 86.7    | <0.0001  |
| Forest × urban                          | -8.8070  | 0.01191  | -739.8  | <0.0001  |
| Min winter temp                         | -0.0619  | 0.00014  | -437.9  | <0.0001  |
| Winter prec                             | -0.0374  | 0.00006  | -609.2  | <0.0001  |

Notes: Abbreviations are: prec, precipitation; min, minimum; temp, temperature. Interaction is marked with × between variables.
